# Supplementary material
Source: publisher figshare collection journal article supplement (https://acs.figshare.com/ndownloader/files/4941814)
Supplement: Supplementary file 1 [file 4941814]

Supporting material for

**Fully understanding photochemistry properties of  $\text{Bi}_2\text{O}_2(\text{CO}_3)_{1-x}\text{S}_x$  nanosheets**

Chao Chang, Fei Teng,<sup>\*</sup> Zailun Liu

Jiangsu Engineering and Technology Research Center of Environmental Cleaning Materials (ECM), Jiangsu Key Laboratory of Atmospheric Environment Monitoring and Pollution Control (AEMPC), Jiangsu Joint Laboratory of Atmospheric Pollution Control (APC), Collaborative Innovation Center of Atmospheric Environment and Equipment Technology (AEET), School of Environmental Science and Engineering, Nanjing University of Information Science & Technology, 219 Ningliu Road, Nanjing 210044, China

The supporting material contains 10 Figures and 1 Table

---

<sup>\*</sup> Corresponding author. Email: tfwd@163.com; Tel./Fax.: +86-25-9882-1090

**Table S1**

**Table S1** The experimental preparation of the samples

| Sample | Bi(NO <sub>3</sub> ) <sub>3</sub><br>(mmol) | CO(NH <sub>2</sub> ) <sub>2</sub><br>(mmol) | Sulfoarea:Bi<br>(mole ratio) | pH<br>value | Temperature<br>(°C) | Reaction time<br>(h) |
|--------|---------------------------------------------|---------------------------------------------|------------------------------|-------------|---------------------|----------------------|
| U1     | 0.2                                         | 0.2                                         | 0:1                          | 9           | 120                 | 24                   |
| U2     | 0.2                                         | 0.2                                         | 0.33:1                       | 9           | 120                 | 24                   |
| U3     | 0.2                                         | 0.2                                         | 0.5:1                        | 9           | 120                 | 24                   |
| U4     | 0.2                                         | 0.2                                         | 1:1                          | 9           | 120                 | 24                   |
| U5     | 0.2                                         | 0.2                                         | 1.5/1                        | 9           | 120                 | 24                   |

**Figure S1**

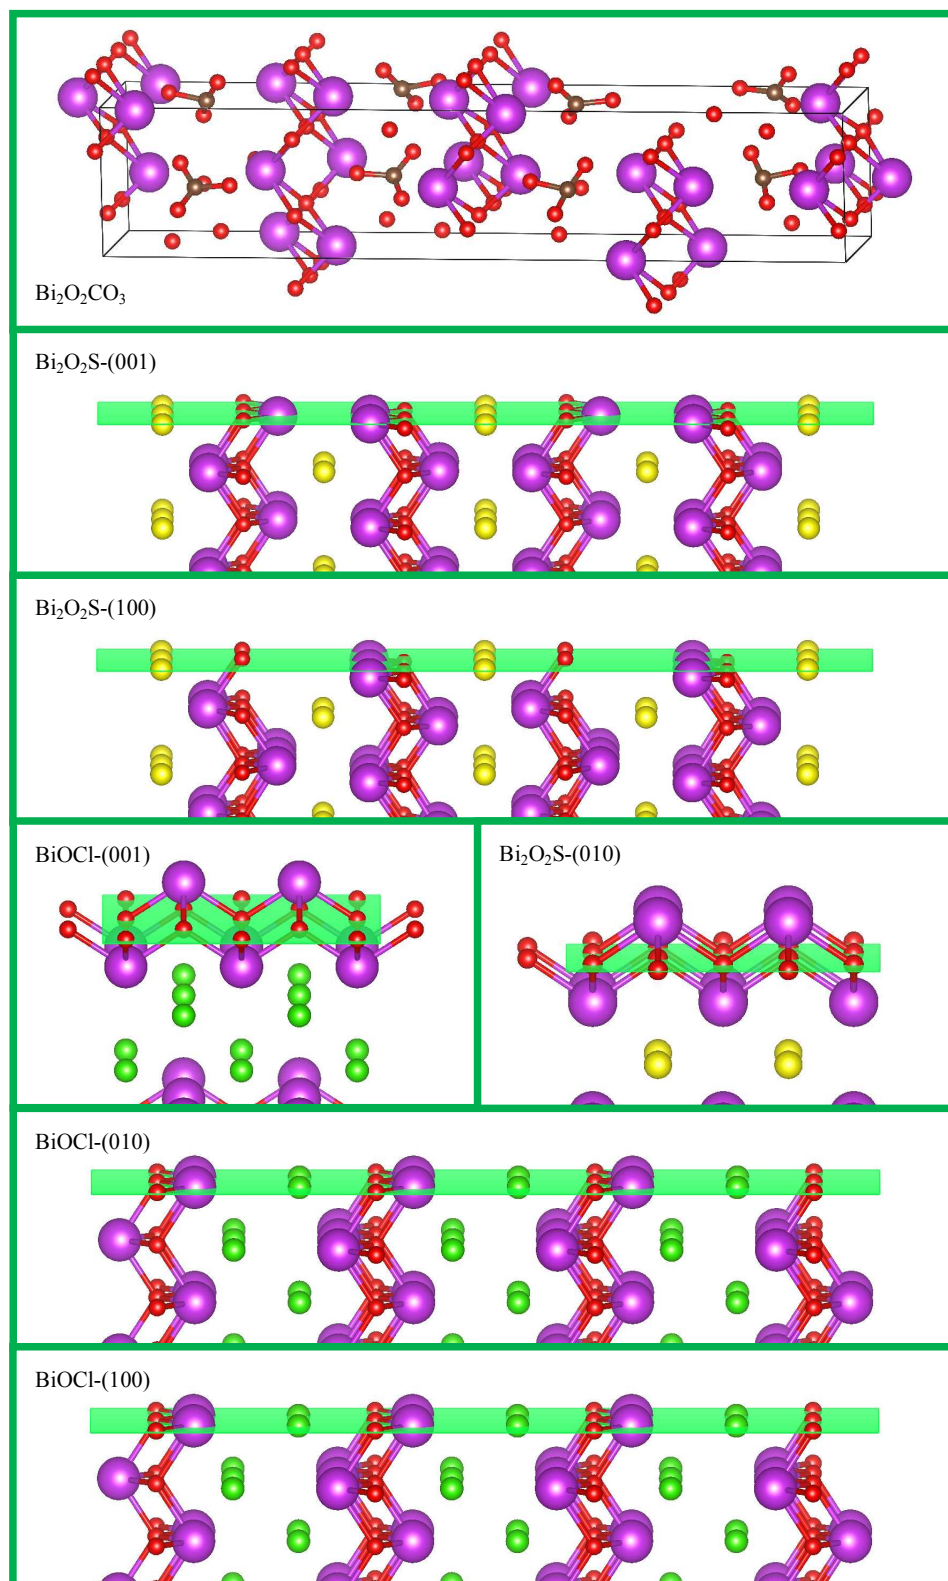

**Figure S1** Atomic and geometric structures of  $\text{Bi}_2\text{O}_2\text{CO}_3$  and different facets for  $\text{Bi}_2\text{O}_2\text{S}$  and  $\text{BiOCl}$

Figure S2

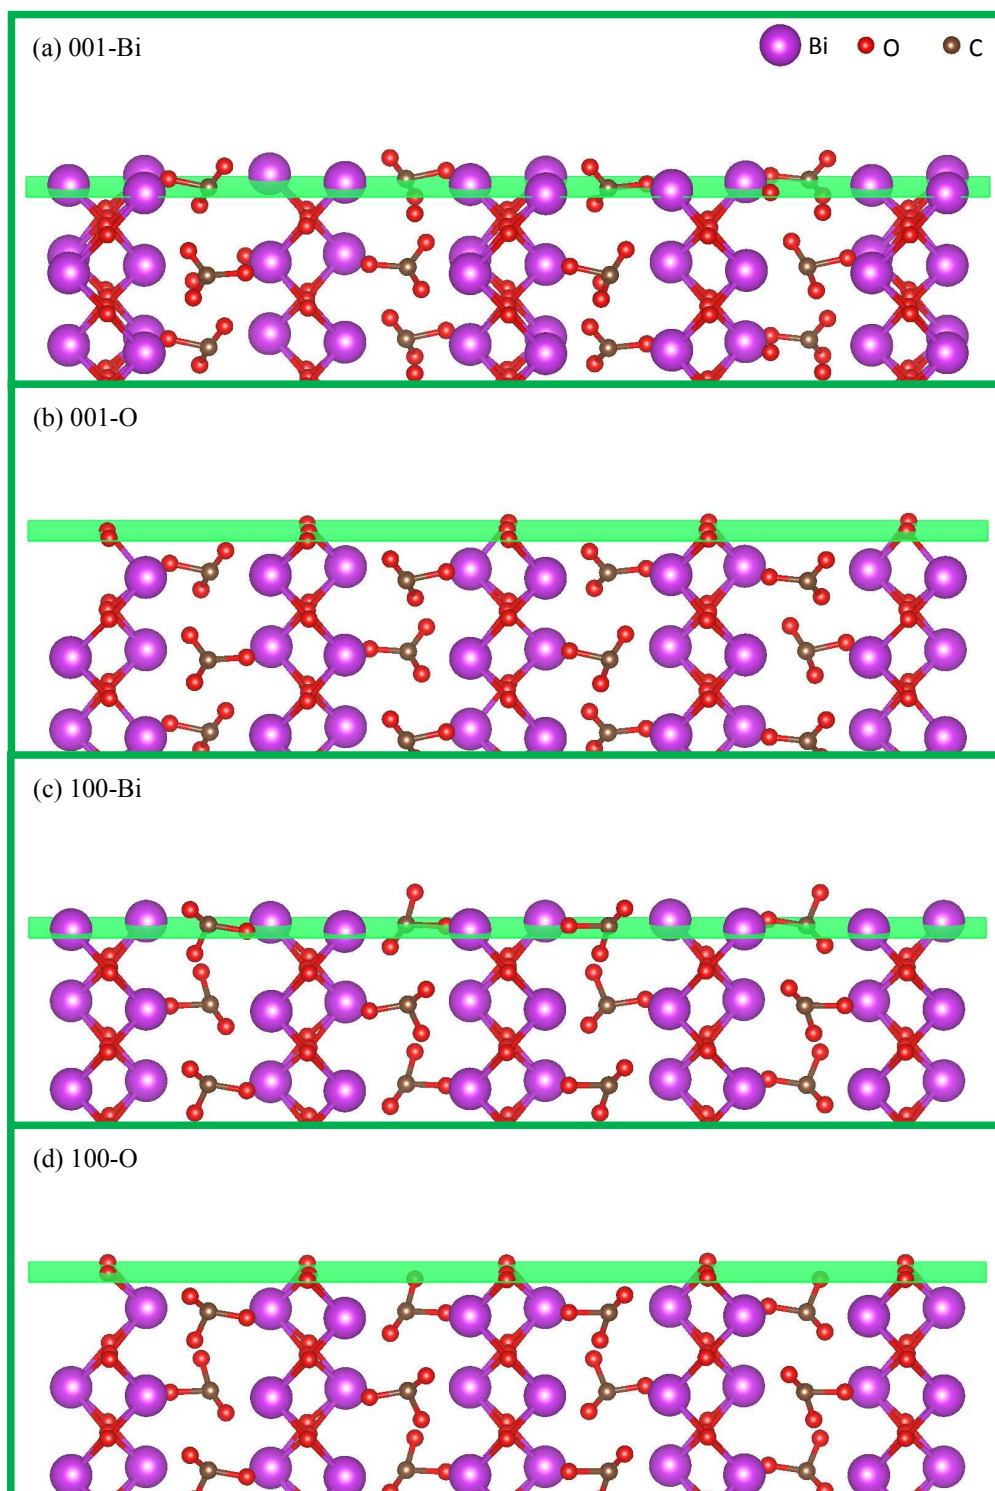

**Figure S2** Atomic and geometric structures of (001) and (100) facets of  $\text{Bi}_2\text{O}_2\text{CO}_3$ : (a) 001-Bi, terminated with Bi; (b) 001-O, terminated with O; (c) 100-Bi, terminated with Bi; (d) 100-O, terminated with O

**Figure S3**

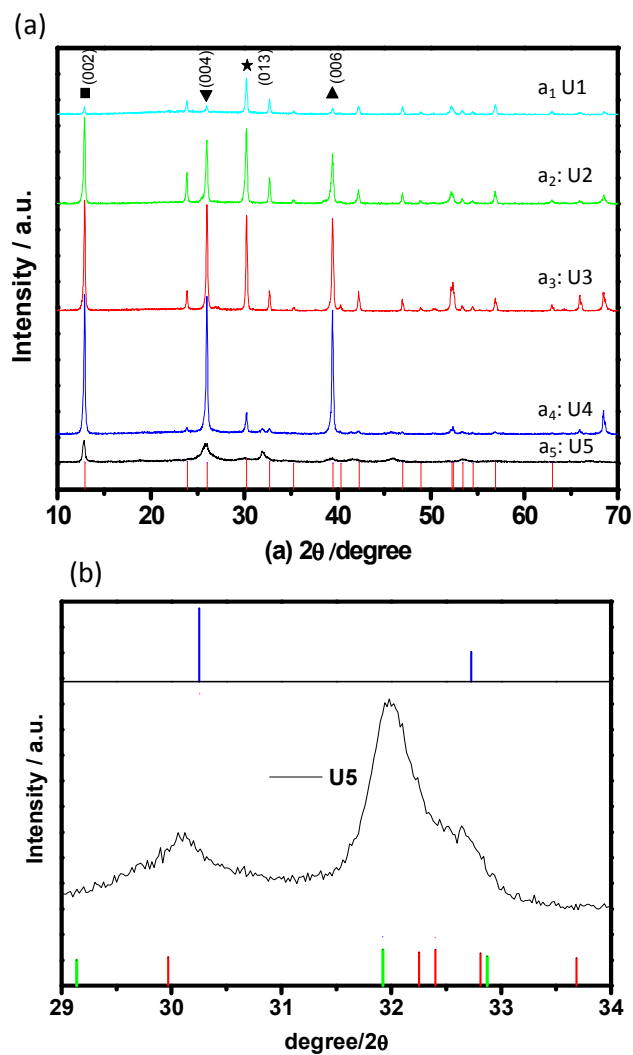

**Figure S3** (a) XRD patterns of the U1-U5 samples in the 2θ range of 10-70°: The (002), (004), (013) and (006) peaks of  $\text{Bi}_2\text{O}_2\text{CO}_3$  (JCPDS no. 41-1488) are marked by ■, ▼, ★ and ▲, respectively; (b) XRD patterns of the U5 sample in the 2θ range of 23-35.5°: Blue, yellow and red patterns represent the standard  $\text{Bi}_2\text{O}_2\text{CO}_3$  (JCPDS no. 41-1488),  $\text{Bi}_2\text{O}_{2.7}$  (JCPDS no. 75-0993) and  $\text{Bi}_2\text{O}_2\text{S}$  (JCPDS no. 75-0717), respectively

**Figure S4**

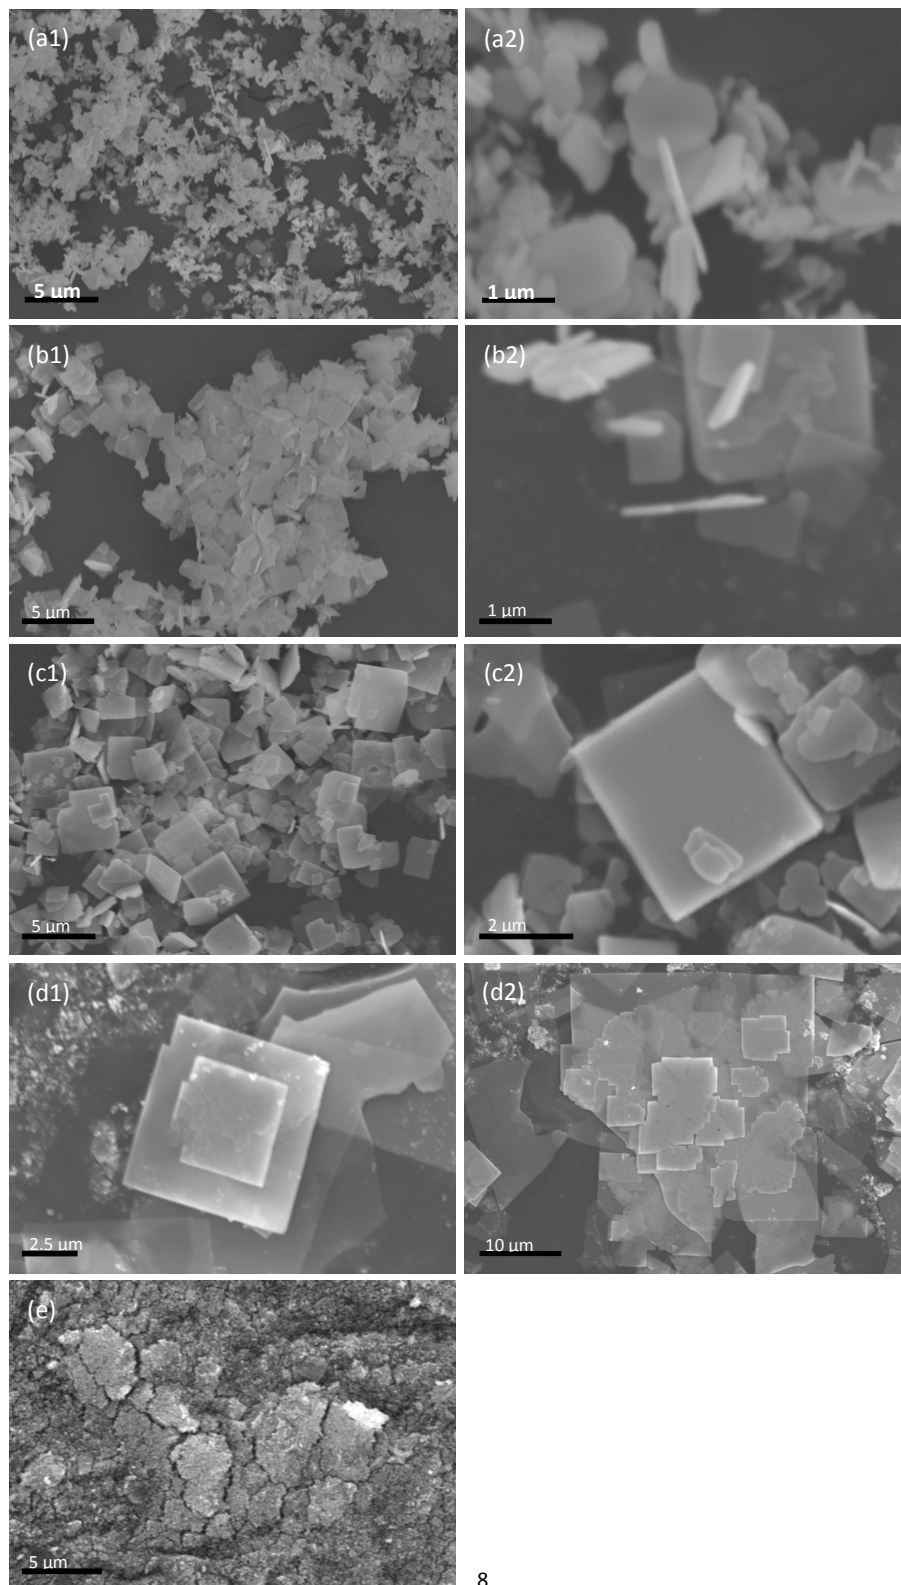



**Figure S4** SEM micrographs of the samples: (a1, a2), U2; (b1, b2), U3; (c1, c2) U4; (d) U5

**Figure S5**

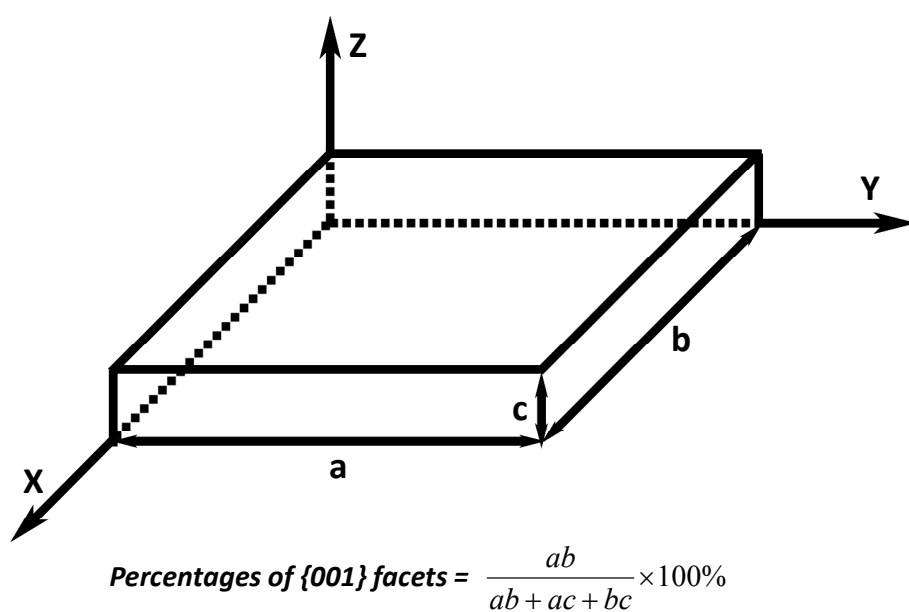

**Figure S5** Geometric diagram of  $\text{Bi}_2\text{O}_2\text{CO}_3$  nanosheets and the formula for calculating the {001} facet

**Figure S6**

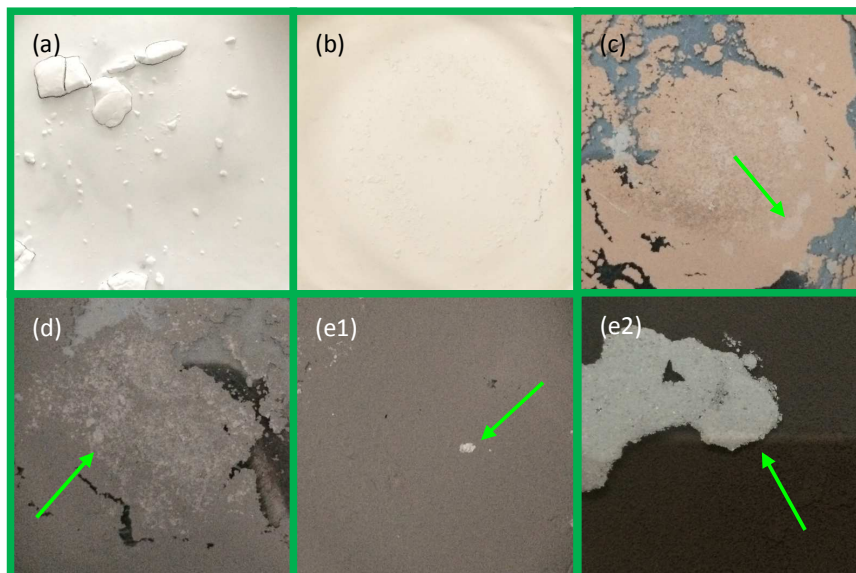

**Figure S6** Photographs of the U1-U5 samples: (a) U1; (b) U2; (c) U; (d) U3; (d) U4; (e1, e2) U5: (e1) and (e2), after and before being dried, respectively

**Figure S7**

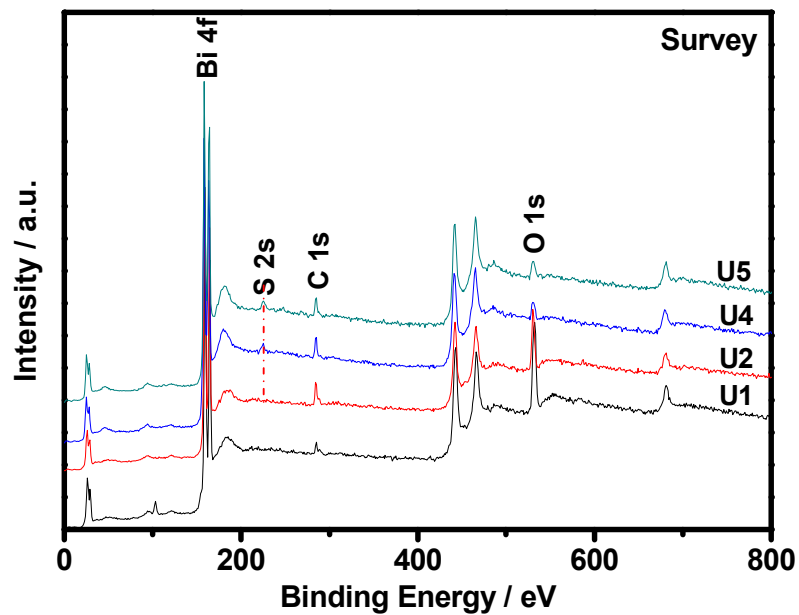

**Figure S7** XPS survey spectra of the U1, U2, U4 and U5 samples

**Figure S8**

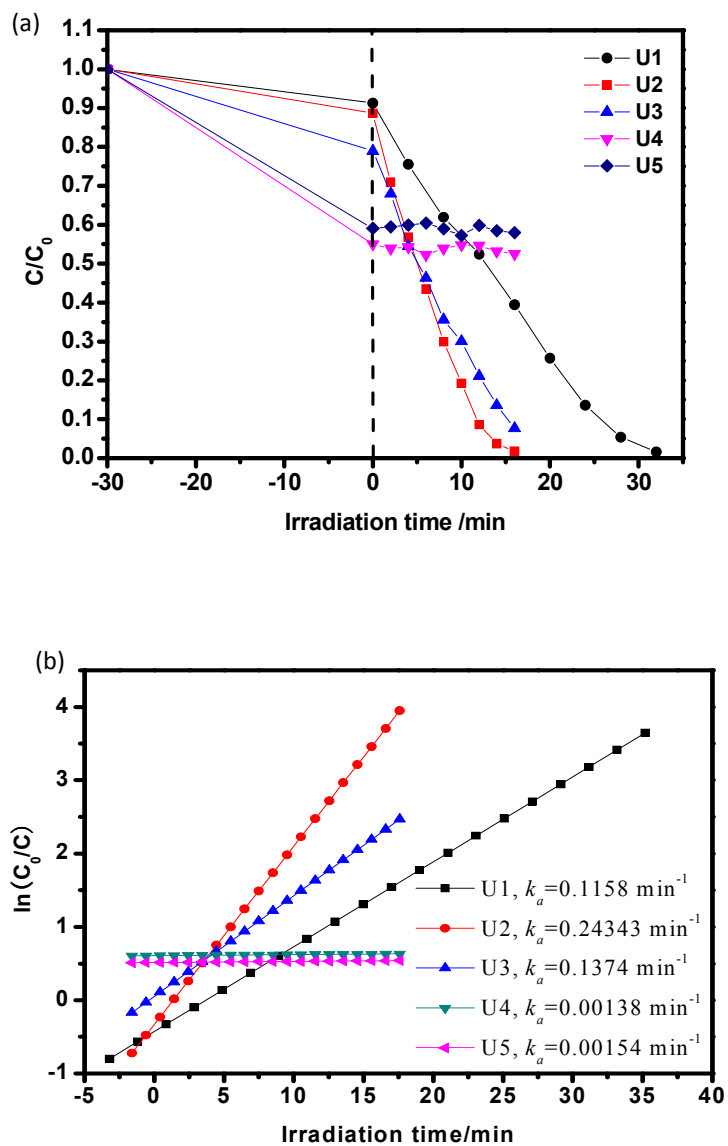

**Figure S8** (a) Degradation curves of RhB over the U1-U5 samples under ultraviolet light irradiation ( $\lambda \leq 400$  nm); (b) Apparent reaction kinetic curves of RhB degradation

**Figure S9**

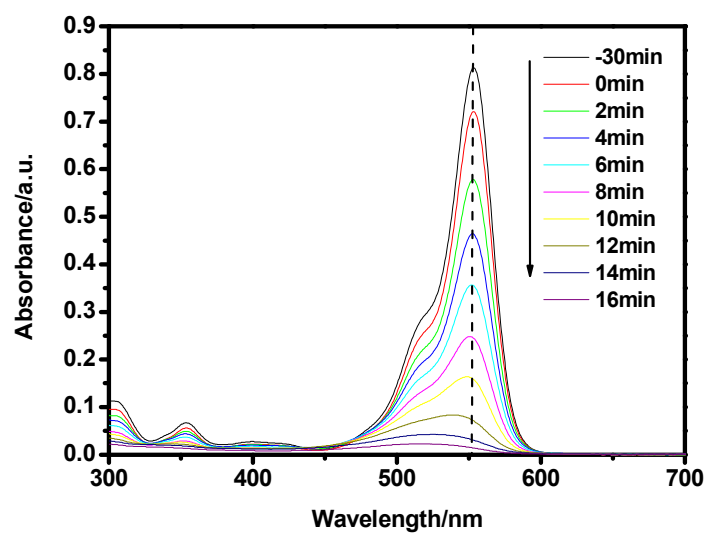

**Figure S9** UV-Vis spectra of RhB aqueous solution as a function of irradiation time over the U2 sample

**Figure S10**

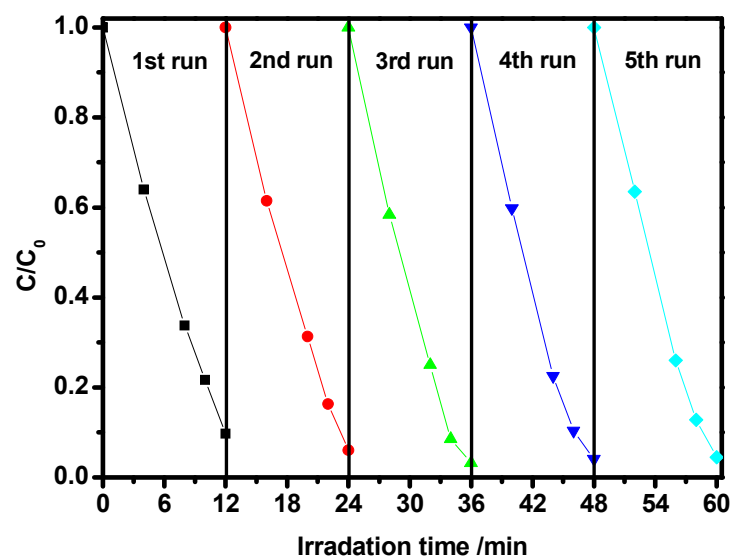

**Figure S10** Cycle curves of the U2 sample for the degradation of RhB under ultraviolet light irradiation ( $\lambda \leq 400$  nm)
